# Supplementary material for: Prism-like bimetallic (Ni–Co) alkaline carboxylate-based non-enzymatic sensor capable of exceptionally high catalytic activity towards glucose
Source: Royal Society of Chemistry journal article supplement (doi:10.1039/d2dt02424a), 2022-01-01
Supplement: d2dt02424a1.pdf [file d2dt02424a1.pdf]

# Prism-like bimetallic (Ni-Co) alkaline carboxylate based non-enzymatic sensor capable of exceptionally high catalytic activity towards glucose

Dandan Chu, Yan Wang, Dong Li, Xue-Qiang Chu, Danhua Ge,\* Xiaojun Chen\*

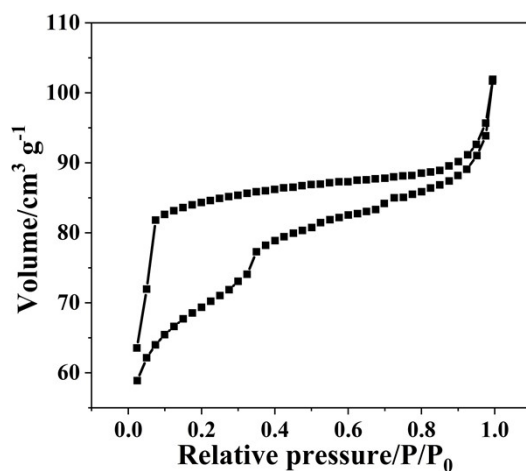

Fig. S1. N<sub>2</sub> adsorption-desorption isotherm of CoNi-MIM (1:1).

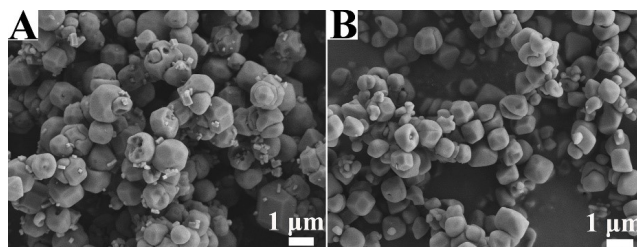

Fig. S2. SEM images of (A) CoNi-MIM (1:2.5) and (B) CoNi-MIM (1:4).

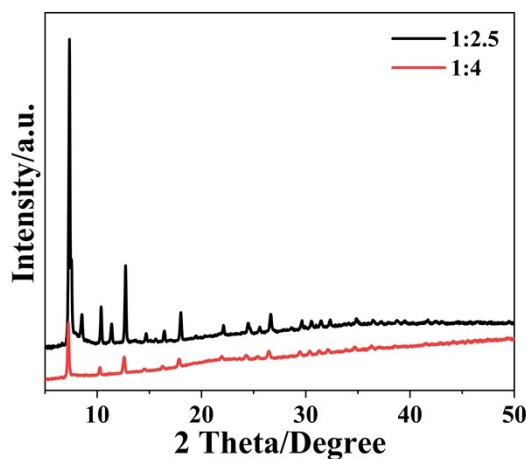

**Fig. S3.** XRD patterns of CoNi-MIM (1:2.5) and CoNi-MIM (1:4).

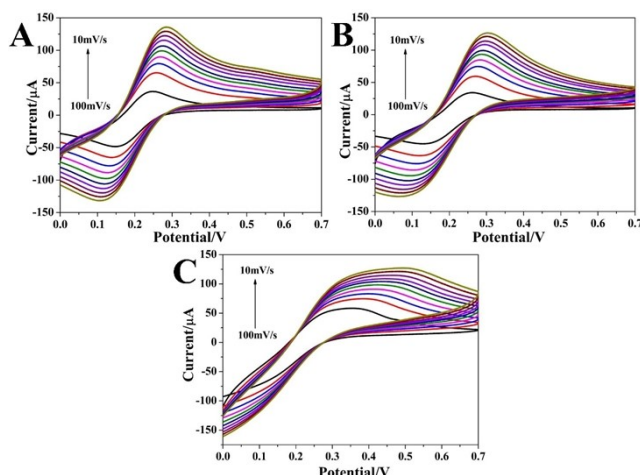

**Fig. S4.** The scan rate study of CoNi-MIM (1:1 (A), 1:2.5 (B) and 1:4 (C)) electrodes with different amounts of 2-methylimidazole in 0.1 M KCl solution containing 5 mM  $K_3[Fe(CN)_6]$ .

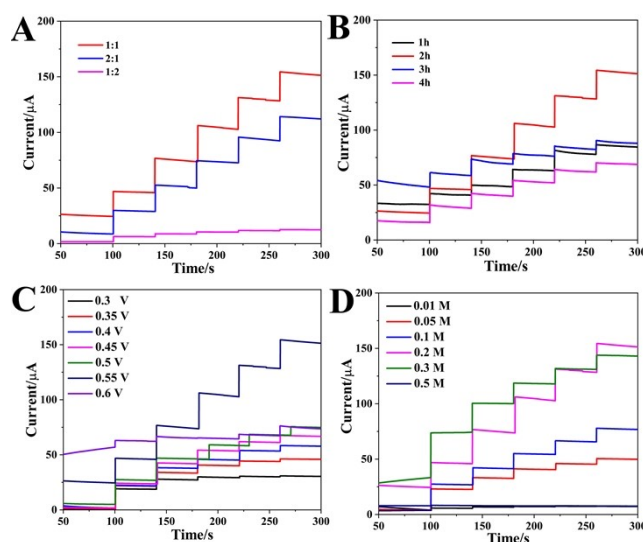

**Fig. S5.** Chronoamperometric responses of the CoNi-MIM/ITO to the successive addition of 1 mM glucose at 0.55 V in 0.2 M NaOH with different ratios of  $Co^{2+}$  and  $Ni^{2+}$  (A) and treated by different holding time (B). Chronoamperometric responses of the CoNi-MIM/ITO to the successive addition of 1 mM glucose in 0.2 M NaOH at different working potentials (C) and at 0.55 V in different concentrations of NaOH solution (D).

**Table S1.** The performance comparison of different non-enzymatic glucose sensors.

| Electrode                | Sensitivity<br>$\mu A\ mM^{-1}\ cm^{-2}$ | Linear range<br>$\mu M$ | LOD/ $\mu M$ | Ref. |
|--------------------------|------------------------------------------|-------------------------|--------------|------|
| Ni/Co UMOFNs             | 2086.7                                   | 1-1400                  | 0.047        | [1]  |
| Ni/Co-PB/CuO/GCE         | 600                                      | 5-100                   | 0.69         | [2]  |
| (Ni-Co)(OH) <sub>2</sub> | 122.45                                   | 25-3700                 | 1.2          | [3]  |

|                                                                 |                 |                       |       |                  |
|-----------------------------------------------------------------|-----------------|-----------------------|-------|------------------|
| Ni(II)-CP/C <sub>60</sub> /GCE                                  | 614.29          | 10-3000<br>3000-11000 | 4.3   | [4]              |
| GCE/CNF@Ni <sub>0.66</sub> Co <sub>0.33</sub> (OH) <sub>2</sub> | 1470            | 1-2000                | 0.03  | [5]              |
| CuO/CoNi-LDHs-2-GCE                                             | -               | 0.1-384               | 0.065 | [6]              |
| Amorphous Co-Ni hydroxide                                       | 1911.5          | 0.25-5000             | 0.12  | [7]              |
| Ni <sub>3</sub> (HITP) <sub>2</sub>                             | -               | 0-10000               | -     | [8]              |
| CoNi-MIM (1:1)/ITO                                              | 5024.4<br>216.8 | 1-35<br>35-14300      | 0.056 | <b>This work</b> |

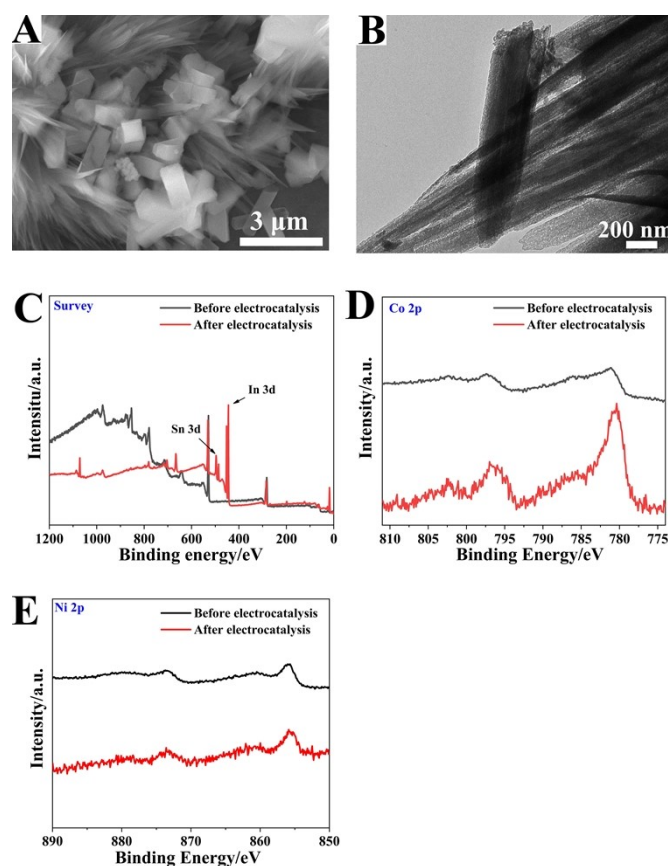

**Fig. S6.** SEM image (A) and TEM image (B) of activated CoNi-MIM (1:1). (C) Full range XPS survey spectrum, (D) Co 2p spectrum and (E) Ni 2p spectrum of CoNi-MIM (1:1) before and after electrocatalysis.

## Reference

- [1] H. Zou, D Tian, C. Lv, S. Wu, G. Lu, Y. Guo, Y. Liu, Y. Yu, K. Ding, The synergistic effect of Co/Ni in ultrathin metal–organic framework nanosheets for the prominent optimization of non-enzymatic electrochemical glucose detection, *J. Mater. Chem. B* 8 (2020) 1008-1016. <https://doi.org/10.1039/C9TB02382H>.
- [2] X. Xu, Y. Zhang, Y. Han, J. Wu, X. Zhang, Y. Xu, Nanosized CuO encapsulated Ni/Co bimetal Prussian blue with high anti-interference and stability for electrochemical non-enzymatic glucose

- detection, *Dalton Trans.* 50 (2021) 13748-13755. <https://doi.org/10.1039/D1DT02361F>.
- [3] C. H. Lien, J. C. Chen, C. C. Hu, D. S. H. Wong, Cathodic deposition of binary nickel-cobalt hydroxide for non-enzymatic glucose sensing, *J. Taiwan Inst. Chem. Eng.* 45 (2014) 846-851. <https://doi.org/10.1016/j.jtice.2013.09.023>.
- [4] L. Shahhoseini, R. Mohammadi, B. Ghanbari, S. Shahrokhian, Ni(II) 1D-coordination polymer/C60-modified glassy carbon electrode as a highly sensitive non-enzymatic glucose electrochemical sensor, *Appl. Surf. Sci.* 478 (2019) 361-372. <https://doi.org/10.1016/j.apsusc.2019.01.240>.
- [5] R. Fu, Y. Lu, Y. Ding, L. Li, Z. Ren, X. Si, Q. Wu, A novel non-enzymatic glucose electrochemical sensor based on CNF@Ni-Co layered double hydroxide modified glassy carbon electrode, *Microchem. J.* 150 (2019) 104106. <https://doi.org/10.1016/j.microc.2019.104106>
- [6] S. An, N. Shang, B. Chen, Y. Kang, M. Su, C. Wang, Y. Zhang, Co-Ni layered double hydroxides wrapped on leaf-shaped copper oxide hybrids for non-enzymatic detection of glucose, *J. Colloid Interf. Sci.* 592 (2021) 205-214. <https://doi.org/10.1016/j.jcis.2021.02.046>
- [7] H. Li, L. Zhang, Y. Mao, C. Wen, P. Zhao, A simple electrochemical route to access amorphous Co-Ni hydroxide for nonenzymatic glucose sensing, *Nanoscale Res. Lett.* 14 (2019) 135. <https://doi.org/10.1186/s11671-019-2966-2>.
- [8] Y. Chen, Y. Tian, P. Zhu, L. Du, W. Chen, C. Wu, Electrochemically activated conductive Ni-based MOFs for non-enzymatic sensors toward long-term glucose monitoring, *Front. Chem.* 8 (2020) 602752. <https://doi.org/10.3389/fchem.2020.602752>.
